# Supplementary material for: Design of a new process for the stabilization of FeS–Bi2S3 hybrid nanostructure and its application as a field emitter
Source: Royal Society of Chemistry journal article supplement (doi:10.1039/d4nr04138k), 2024-01-01
Supplement: d4nr04138k1.pdf [file d4nr04138k1.pdf]

### Supporting information

#### Design of new process for stabilization of FeS-Bi<sub>2</sub>S<sub>3</sub> hybrid nanostructure and its application as field emitter

Arushi Arora <sup>a</sup>, Anima Mahajan <sup>b</sup>, Nausad Khan <sup>a</sup>, Santanu Ghosh <sup>b</sup> and Menaka Jha <sup>a</sup>

<sup>a</sup>*Institute of Nano Science & Technology, Knowledge City, Sector 81, Mohali, Punjab–140306, India*

<sup>b</sup>*Department of Physics, Indian Institute of Technology, Hauz Khas, New Delhi 110016, India*

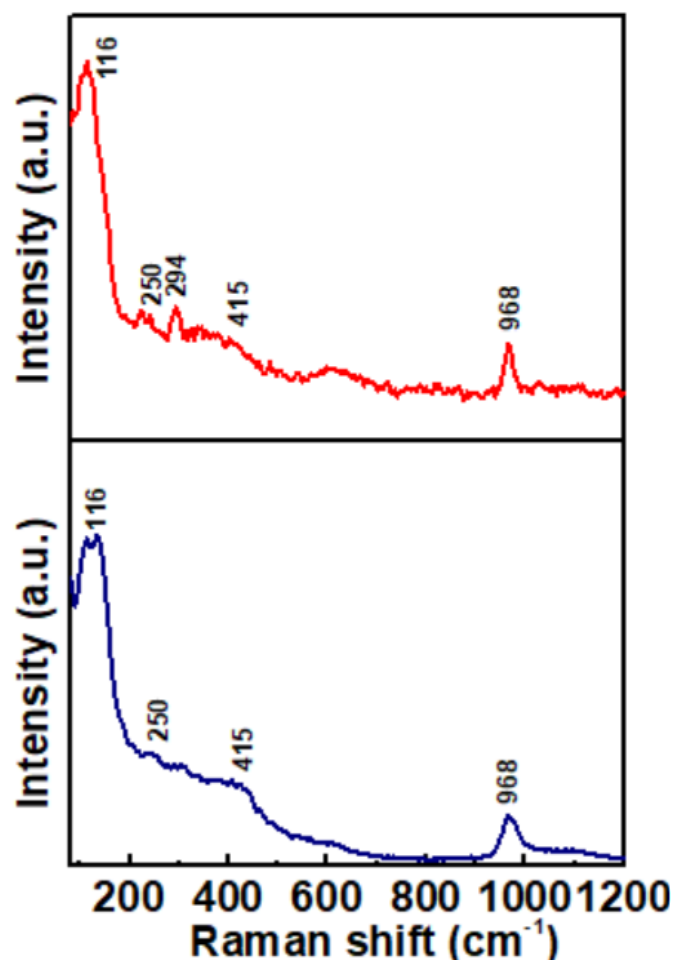

Figure S1: (a) Raman spectra of Bi<sub>2</sub>S<sub>3</sub> and (b) FeS-Bi<sub>2</sub>S<sub>3</sub>

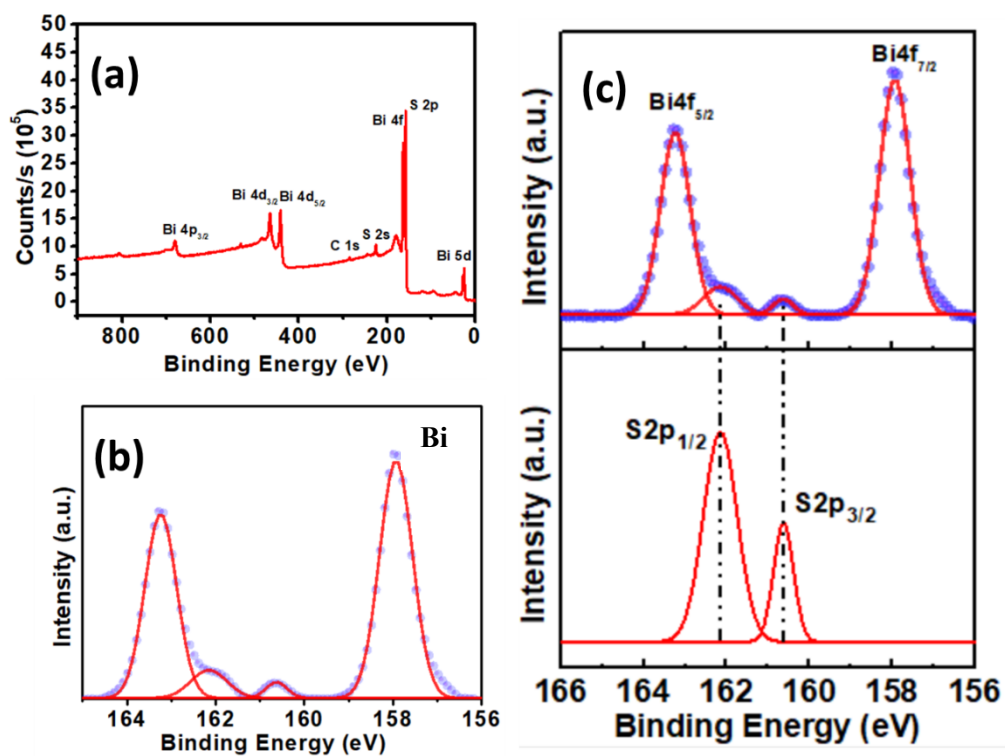

Figure S2: (a) Wide scan X-ray photoelectron spectroscopy (XPS) survey spectra of  $\text{Bi}_2\text{S}_3$  and High-resolution spectra of (b) Bi4f and (c) S2p

=

Table S1: Atomic % of Fe, Bi and S by TEM-EDX, XPS and ICP-MS

| % Atomic composition        |          | Bi (%) | S (%) | Fe (%) |
|-----------------------------|----------|--------|-------|--------|
| $\text{Bi}_2\text{S}_3$     | TEM EDAX | 38.69  | 61.81 | -      |
|                             | XPS      | 41.39  | 58.6  | -      |
|                             | ICP-MS   | -      | -     | -      |
|                             | CHNS     | -      | 16.9  | -      |
| $\text{FeS-Bi}_2\text{S}_3$ | TEM EDAX | 39.90  | 55.21 | 4.82   |
|                             | XPS      | 34.92  | 60.01 | 5.07   |

|  |        |       |       |      |
|--|--------|-------|-------|------|
|  | ICP-MS | 40.03 | -     | 5.93 |
|  | CHNS   | -     | 20.39 | -    |

The observed atomic % are in close agreement with observed ratio of Bi:S 2:3 i.e. 0.66”.
